# Supplementary material
Source: HighWire-hosted journal article supplement (https://sti.bmj.com/content/97/7/525)
Supplement: inline-supplementary-material-4 [file inline-supplementary-material-4.pdf]

**Supplementary Table S4. Information on participants characteristics and study characteristics & results of the Newcastle-Ottawa scale assessment.**

| <b>Prevalent</b>                                                         | <b>Desai et al</b> | <b>Frits et al</b> | <b>Gabriele et al</b> | <b>Jin et al</b>      | <b>Laia et al</b> | <b>Lee et al</b> |
|--------------------------------------------------------------------------|--------------------|--------------------|-----------------------|-----------------------|-------------------|------------------|
| <b>Study year</b>                                                        | 2017               | 2013               | 2006                  | 2010                  | 2016              | 2008             |
| <b>Study design</b>                                                      | CT                 | CT                 | CT                    | CT                    | CT                | CC               |
| <b>Country</b>                                                           | Europe (England)   | Asia (Thailand)    | Africa (Tanzania)     | Australia (Australia) | Europe (Spain)    | Asia (China)     |
| <b>Study population</b>                                                  | MSM                | MSM                | FBW                   | MSM                   | MSM               | STDA             |
| <b>No. of participants</b>                                               | 9309               | 3750               | 360                   | 5084                  | 2876              | 392              |
| <b>Mean or Median age</b>                                                | 34                 | 26                 | 25                    | 35                    | 33                | NR               |
| <b>Syphilis prevalence (Baseline) (%)</b>                                | 1.9                | 4.7                | 17.5                  | 2.9                   | 0.6               | 3.4              |
| <b>Syphilis confirm test</b>                                             | NR                 | RPR&IC             | RPR&TPPA              | RPR&TTs               | RPR&TPPA          | VDRL&TPPA        |
| <b>Length of time between tests for HIV (1&lt;=6 months or 2&gt;6)</b>   | 1                  | 1                  | 1                     | 2                     | 2                 | NR               |
| <b>Follow-up rate</b>                                                    | NR                 | 76.1%              | 74.5%                 | 81.0%                 | 63.4%             | 2.40%            |
| <b>HIV acquisition (%)</b>                                               | 2.00               | 5.90               | NR                    | 0.78                  | 2.40              | NR               |
| <b>Timing of incident syphilis infection relative to HIV acquisition</b> | DB                 | DB                 | B&C                   | DB                    | B&C               | B&C              |
| <b>Definition of unexposed group</b>                                     | F-U                | B                  | F-U                   | F-U                   | F-U               | B                |
| <b>Adjusted for condom use?</b>                                          | N                  | Y                  | N                     | NR                    | N                 | Y                |
| <b>Adjusted for male circumcision status?</b>                            | N                  | N                  | Y                     | NR                    | N                 | Y                |
| <b>Adjusted for genital ulcer disease?</b>                               | Y                  | Y                  | N                     | NR                    | N                 | N                |
| <b>Adjusted for any sexual behavior (excluding condom use)?</b>          | N                  | Y                  | Y                     | NR                    | N                 | N                |
| <b>Adjusted for number of sexual partners?</b>                           | N                  | Y                  | N                     | NR                    | N                 | N                |
| <b>Adjusted for age?</b>                                                 | N                  | Y                  | N                     | NR                    | Y                 | N                |
| <b>Adjusted for drug use?</b>                                            | N                  | Y                  | N                     | NR                    | N                 | Y                |
| <b>Selection 1)</b>                                                      | *                  | *                  | *                     | *                     | *                 | *                |
| <b>Selection 2)</b>                                                      | *                  | *                  | *                     | *                     | *                 | *                |
| <b>Selection 3)</b>                                                      | *                  |                    | *                     |                       | *                 | *                |
| <b>Selection 4)</b>                                                      | *                  | *                  | *                     | *                     | *                 | *                |
| <b>Comparability 1a)</b>                                                 |                    | *                  |                       |                       |                   | *                |

| Continued from previous page |             |             |                |           |            |           |
|------------------------------|-------------|-------------|----------------|-----------|------------|-----------|
| Prevalent                    | Desai et al | Frits et al | Gabriele et al | Jin et al | Laia et al | Lee et al |
| Comparability 1b)            |             | *           |                |           |            |           |
| Exposure 1)                  | *           | *           | *              | *         | *          |           |
| Exposure 2)                  | *           | *           | *              | *         | *          | *         |
| Exposure 3)                  |             |             |                | *         |            | *         |

| Prevalent                                                         | Matthew et al | Matthew et al | Mehta et al   | Rebecca et al         | Ruzagiza et al  |
|-------------------------------------------------------------------|---------------|---------------|---------------|-----------------------|-----------------|
| Study year                                                        | 2017          | 2016          | 2006          | 2011                  | 2011            |
| Study design                                                      | CC            | CT            | CT            | CT                    | CT              |
| Country                                                           | America (USA) | America (USA) | America (USA) | Australia (Australia) | Africa (Uganda) |
| Study population                                                  | MSM           | MSM           | STDA          | MSM                   | HIV-DC          |
| No. of participants                                               | 15107         | 2593          | 13693         | 4488                  | 787             |
| Mean or Median age                                                | 32            | NR            | 25            | 32                    | 36              |
| Syphilis prevalence (Baseline) (%)                                | 1.1           | 1.5           | 2.8           | 2.0                   | 5.2             |
| Syphilis confirm test                                             | RPR           | RPR           | NTT&TT        | NR                    | RPR&TPHA        |
| Length of time between tests for HIV (1<=6 months or 2>6)         | 2             | 1             | 1             | 2                     | 1               |
| Follow-up rate                                                    | 88.3%         | 88.1%         | NR            | NR                    | 97.4%           |
| HIV acquisition (%)                                               | 2.18          | 5.40          | 0.91          | 1.24                  | 4.30            |
| Timing of incident syphilis infection relative to HIV acquisition | DB            | DB            | B&C           | DB                    | B&C             |
| Definition of unexposed group                                     | B             | F-U           | F-U           | F-U                   | F-U             |
| Adjusted for condom use?                                          | NR            | NR            | N             | Y                     | Y               |
| Adjusted for male circumcision status?                            | NR            | NR            | N             | N                     | Y               |
| Adjusted for genital ulcer disease?                               | NR            | NR            | N             | Y                     | Y               |
| Adjusted for any sexual behavior (excluding condom use)?          | NR            | NR            | Y             | Y                     | N               |
| Adjusted for number of sexual partners?                           | NR            | NR            | N             | Y                     | N               |
| Adjusted for age?                                                 | NR            | NR            | Y             | Y                     | Y               |
| Adjusted for drug use?                                            | NR            | NR            | Y             | N                     | N               |
| Selection 1)                                                      | *             | *             | *             | *                     | *               |
| Selection 2)                                                      | *             | *             | *             | *                     | *               |

| Continued from previous page |               |               |             |               |                |   |
|------------------------------|---------------|---------------|-------------|---------------|----------------|---|
| Prevalent                    | Matthew et al | Matthew et al | Mehta et al | Rebecca et al | Ruzagiza et al |   |
| Selection 3)                 | *             |               | *           | *             | *              |   |
| Selection 4)                 | *             | *             | *           | *             | *              |   |
| Comparability 1a)            |               |               |             |               |                | * |
| Comparability 1b)            |               |               |             |               |                | * |
| Exposure 1)                  |               | *             | *           | *             | *              |   |
| Exposure 2)                  | *             | *             | *           | *             | *              |   |
| Exposure 3)                  | *             | *             |             |               |                | * |

| Prevalent                                                         | Su et al     | Ulrich et al     | Xu et al     | Xu et al     | Yang et al   | Yang et al   |
|-------------------------------------------------------------------|--------------|------------------|--------------|--------------|--------------|--------------|
| Study year                                                        | 2016         | 2006             | 2013         | 2010         | 2010         | 2016         |
| Study design                                                      | CT           | CC               | CT           | CT           | CT           | CC           |
| Country                                                           | Asia (China) | Europe (Germany) | Asia (China) | Asia (China) | Asia (China) | Asia (China) |
| Study population                                                  | FSW          | MSM              | MSM          | MSM          | MSM          | MSM          |
| No. of participants                                               | 3106         | 356              | 313          | 122          | 286          | 303          |
| Mean or Median age                                                | 27           | 36               | 28           | 27           | NR           | 28           |
| Syphilis prevalence (Baseline) (%)                                | 7.4          | 41.0             | 5.8          | 25.4         | 12.6         | 12.2         |
| Syphilis confirm test                                             | RPR&TPPA     | RPR&TPHA         | RPR&TPPA     | RPR&TPPA     | RPR&TPPA     | TRUST        |
| Length of time between tests for HIV (1<=6 months or 2>6)         | 1            | NR               | 1            | 1            | 1            | NR           |
| Follow-up rate                                                    | NR           | 47.5%            | 70.0%        | 56.0%        | 72.0%        | NR           |
| HIV acquisition (%)                                               | 1.06         | 5.60             | 3.50         | 5.40         | 5.12         | NR           |
| Timing of incident syphilis infection relative to HIV acquisition | DB           | DB               | DB           | DB           | DB           | B&C          |
| Definition of unexposed group                                     | B            | F-U              | F-U          | B            | B            | B            |
| Adjusted for condom use?                                          | Y            | NR               | Y            | Y            | NR           | Y            |
| Adjusted for male circumcision status?                            | Y            | NR               | Y            | N            | NR           | N            |
| Adjusted for genital ulcer disease?                               | N            | NR               | N            | N            | NR           | N            |
| Adjusted for any sexual behavior (excluding condom use)?          | N            | NR               | Y            | Y            | NR           | Y            |

| Continued from previous page            |          |              |          |          |            |            |
|-----------------------------------------|----------|--------------|----------|----------|------------|------------|
| Prevalent                               | Su et al | Ulrich et al | Xu et al | Xu et al | Yang et al | Yang et al |
| Adjusted for number of sexual partners? | Y        | NR           | Y        | Y        | NR         | Y          |
| Adjusted for age?                       | N        | NR           | Y        | N        | NR         | N          |
| Adjusted for drug use?                  | Y        | NR           | Y        | N        | NR         | N          |
| Selection 1)                            | *        | *            | *        | *        | *          | *          |
| Selection 2)                            | *        | *            | *        | *        | *          | *          |
| Selection 3)                            | *        | *            |          |          |            | *          |
| Selection 4)                            | *        | *            | *        | *        | *          | *          |
| Comparability 1a)                       | *        |              | *        | *        |            | *          |
| Comparability 1b)                       | *        |              | *        | *        |            | *          |
| Exposure 1)                             | *        | *            | *        | *        | *          |            |
| Exposure 2)                             | *        | *            | *        | *        | *          | *          |
| Exposure 3)                             |          |              |          |          |            | *          |

| Incident                                                          | Li et al     | Li et al     | Sarah et al     | Tang et al   | Wang et al   |
|-------------------------------------------------------------------|--------------|--------------|-----------------|--------------|--------------|
| Study year                                                        | 2010         | 2012         | 2011            | 2014         | 2014         |
| Study design                                                      | CT           | CC           | CT              | CT           | CT           |
| Country                                                           | Asia (China) | Asia (China) | Africa (Rwanda) | Asia (China) | Asia (China) |
| Study population                                                  | MSM          | MSM          | FSW             | MSM          | MSM          |
| No. of participants                                               | 425          | 593          | 373             | 359          | 557          |
| Mean or Median age                                                | 26           | 28           | 24              | NR           | 36           |
| Syphilis prevalence (Baseline) (%)                                | 16.9         | 16.4         | 7.3             | 12.6         | 30.9         |
| Syphilis confirm test                                             | RPR&TPPA     | RPR&TPPA     | RPR&TPPA        | RPR&TPPA     | TRUST&TPPA   |
| Length of time between tests for HIV (1<=6 months or 2>6)         | 1            | 1            | 1               | 1            | 1            |
| Follow-up rate                                                    | 86.2%        | 86.8%        | 85.0%           | 51.2%        | 60.3%        |
| HIV acquisition (%)                                               | 2.60         | 8.09         | 5.60            | 3.60         | 6.78         |
| Timing of incident syphilis infection relative to HIV acquisition | B&C          | DB           | B&C             | DB           | B&C          |
| Definition of unexposed group                                     | F-U          | F-U          | F-U             | F-U          | F-U          |
| Adjusted for condom use?                                          | N            | Y            | Y               | Y            | Y            |

| Continued from previous page                             |          |          |             |            |            |
|----------------------------------------------------------|----------|----------|-------------|------------|------------|
| Incident                                                 | Li et al | Li et al | Sarah et al | Tang et al | Wang et al |
| Adjusted for male circumcision status?                   | N        | N        | N           | N          | N          |
| Adjusted for genital ulcer disease?                      | Y        | Y        | N           | N          | N          |
| Adjusted for any sexual behavior (excluding condom use)? | N        | Y        | N           | N          | N          |
| Adjusted for number of sexual partners?                  | N        | Y        | N           | N          | N          |
| Adjusted for age?                                        | N        | Y        | Y           | Y          | Y          |
| Adjusted for drug use?                                   | N        | N        | N           | N          | N          |
| Selection 1)                                             | *        | *        | *           | *          | *          |
| Selection 2)                                             | *        | *        | *           | *          | *          |
| Selection 3)                                             | *        |          | *           |            | *          |
| Selection 4)                                             | *        | *        | *           | *          | *          |
| Comparability 1a)                                        |          | *        | *           | *          | *          |
| Comparability 1b)                                        |          | *        |             |            |            |
| Exposure 1)                                              | *        | *        | *           | *          | *          |
| Exposure 2)                                              | *        | *        | *           | *          | *          |
| Exposure 3)                                              | *        | *        | *           |            |            |

CT=Cohort study; CC=Case-control study; MSM=Men who have sex with men; FBW=Female bar workers; STDA=STD clinic attendees; HIV-DC=HIV discordant couples; FSW=Female sex workers; NR=Not reported; DB=Definitely before; B&C=Before and indeterminably close; F-U=Follow-up (Syphilis negative throughout follow-up/retrospective); B=Baseline (Syphilis negative at baseline); N=No; Y=Yes; NTT=nontreponemal test; TT=treponemal test; VDRL=Venereal Disease Research Laboratory; RPR=rapid plasma regain; TRUST=toluidine red unheated serum test; FTA-Abs=fluorescent treponemal antibody absorbed test; TPPA=T. pallidum passive particle agglutination; TPHA=T. pallidum haemagglutination assay; IA=immunoassay.

### C. Analytic Methods

#### Principal meta-analysis

We did data analyses using the meta packages of STATA (version 15.0). Considering that most of our studies (18 of 22 studies) are cohort study, we chose the relative risk (RR) as effect size to measure the association between syphilis and HIV. For those case-control studies, we used the following formulae to convert OR to RR.

Relative risk=odds ratio/(1-p<sub>0</sub>+(p<sub>0</sub>×odds ratio)) (Where p<sub>0</sub> is the baseline risk)

To estimate the overall effect size, we used the random-effect method of DerSimonian and Laird to pool weighted RR of HIV risk estimates. An RR >1 indicated an increased likelihood of an outcome of interest among syphilis positive population compared with syphilis negative population, while an RR <1 indicated a reverse outcome.
