# Supplementary material
Source: HighWire-hosted journal article supplement (https://sti.bmj.com/content/97/7/525)

2) Supplementary Figure S2. Forest plot of the association between exposure to syphilis infection and HIV, sub-pooled RR estimates based on population.

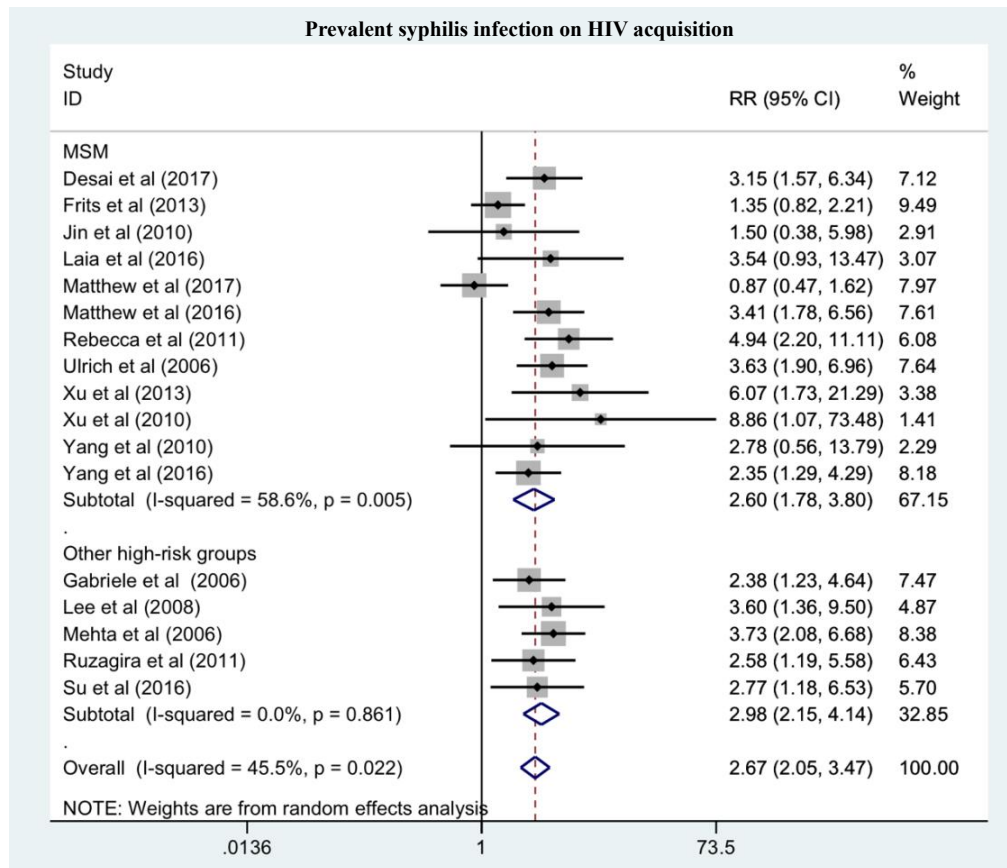

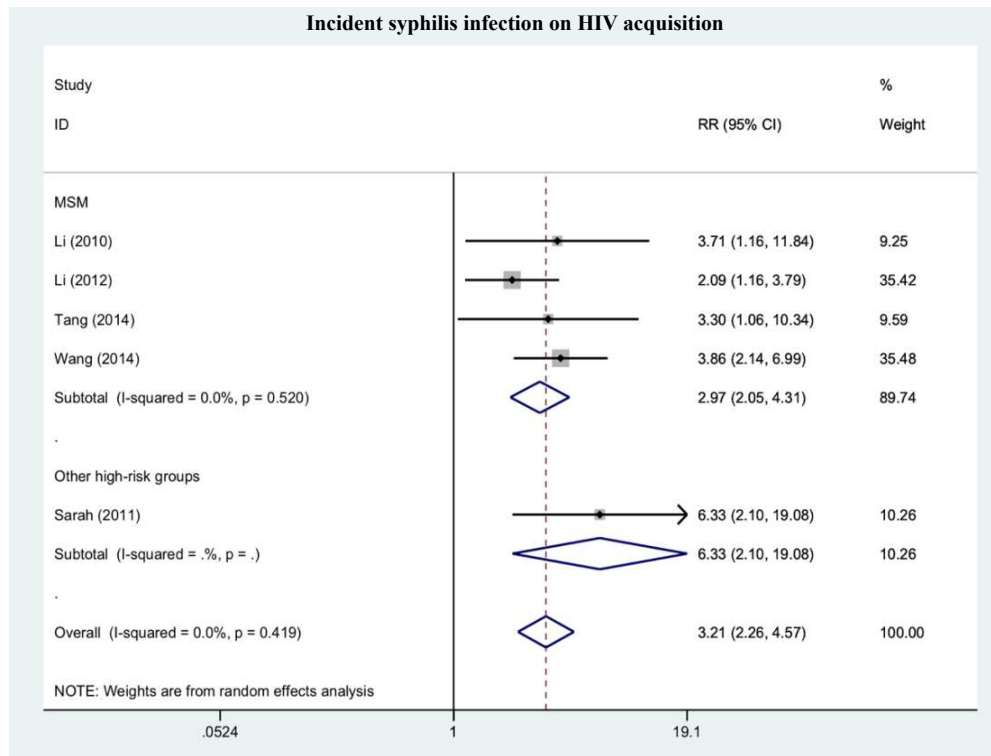

Supplement: inline-supplementary-material-6 [file inline-supplementary-material-6.pdf]
